# Supplementary material for: Preparation of near-infrared AIEgen-active fluorescent probes for mapping amyloid-β plaques in brain tissues and living mice
Source: Springer Nature journal article supplement (doi:10.1038/s41596-022-00789-1), 2023-01-25
Supplement: MOESM2 [file 41596_2022_789_MOESM2_ESM17.xlsx]

## Sheet: Supplementary_Fig_2
Supplementary Fig. 2		Source data of the selectivity test (in PBS).
	Parameter x	Parameter 1	Parameter 2	Parameter 3
	peanut agglutinin	0.01067	0.01075	0.01063
	pepsin	0.01306	0.01306	0.01318
	lysozyme	0.07028	0.07031	0.0701
	tyrosinase	0.0045	0.00452	0.00453
	α-KA	0.0046	0.00465	0.00469
	D-(+)-mannose	0.00725	0.00729	0.00732
	D-galactose	0.00929	0.00933	0.00914
	Leu	0.00752	0.0075	0.00754
	Glu	0.00703	0.00705	0.007
	Phe	0.00832	0.0083	0.00851
	Pro	0.00284	0.0028	0.00271
	Thr	0.002	0.00189	0.0021
	Tro	0.0024	0.00245	0.0025
	Tyr	0.00348	0.00345	0.00381
	Unaggregated Aβ42	0.09605	0.1187	0.1003
	Aβ42 aggregates	1	0.95	0.98147

## Sheet: Supplementary_Fig_3
Supplementary Fig. 3		Source data of the selectivity test (in DMEM).
	Parameter x	Parameter 1	Parameter 2	Parameter 3
	peanut agglutinin	0.0577888	0.0596976	0.0592306
	pepsin	0.0953757	0.0756185	0.0870658
	lysozyme	0.0440588	0.0377293	0.0463816
	tyrosinase	0.0411425	0.0349339	0.0351612
	α-KA	0.0358783	0.043053	0.0413012
	D-(+)-mannose	0.0336283	0.0371044	0.0382719
	D-galactose	0.0444158	0.0439532	0.0482478
	Leu	0.0367811	0.0409527	0.041898
	Glu	0.0587604	0.0710977	0.0558461
	Phe	0.0528414	0.0478847	0.0514937
	Pro	0.0510177	0.0738744	0.0442399
	Thr	0.0359146	0.0366779	0.0398474
	Tro	0.0931869	0.0880503	0.100997
	Tyr	0.0531968	0.0490696	0.0494082
	Unaggregated Aβ42	0.0898895	0.104032	0.103248
	Aβ42 aggregates	0.955076	1.00377	1.04116

## Sheet: Supplementary_Fig_7b
Supplementary Fig. 7b		Source data of the water solubility test of QM-FN-SO3.
	Parameter x	Parameter
	0	-0.00018
	5	0.070642
	10	0.129749
	15	0.188267
	20	0.245005
	25	0.326158
	Sample 1	0.065209
	Sample 2	0.321046

## Sheet: Supplementary_Fig_9a
Supplementary Fig. 9a		Fluorescent intensities of the ROI of wild-type mice and APP/PS1 mice at 20 min.
	Parameter x	Parameter 1	Parameter 2	Parameter 3
	Wild-type mice	0.340567	0.418700	0.220858
	AD-model mice	1.126	0.989405	0.884593

## Sheet: Supplementary_Fig_9b
Supplementary Fig. 9b		Fluorescent intensities of the ROI of wild-type mice and APP/PS1 mice with time.
		Wild-type mice			AD-model mice
	Parameter x	Parameter 1	Parameter 2	Parameter 3	Parameter 1	Parameter 2	Parameter 3
	5	0.497707	0.565254	0.436486	0.676170	0.604865	0.576739
	20	0.340567	0.418700	0.220858	1.126	0.989405	0.884593
	30	0.251195	0.324484	0.163596	0.785052	0.764960	0.902304
	60	0.242392	0.293082	0.135028	0.563159	0.748018	0.785047
